# Supplementary material for: Prevalence and Factors Associated with Driving Under the Influence of Alcohol in Brazil: An Analysis by Macroregion
Source: PubMed Central journal article supplement (PMC7037342; doi:10.3390/ijerph17030767), 2020-01-25
Supplement: ijerph-17-00767-s001.pdf [file ijerph-17-00767-s001.pdf]

**Table S1.** Descriptive Analysis of Sociodemographic and Behavioral Characteristics in the Sample Study, by Macroregion of Brazil. National Health Survey, 2013.

| Variables                                            | Total<br>(n = 9537) | Southeast<br>(n = 2226) | South<br>(n = 1648) | Central-West<br>(n = 1512) | Northeast<br>(n = 2573) | North<br>(n = 1578) | $\chi^2$ | p-value* |
|------------------------------------------------------|---------------------|-------------------------|---------------------|----------------------------|-------------------------|---------------------|----------|----------|
| Gender                                               |                     |                         |                     |                            |                         |                     |          |          |
| Female                                               | 19.7 (18.1–21.5)    | 20.6 (17.6–20.1)        | 20.1 (19.7–26.8)    | 23.1 (20.4–26.1)           | 14.6 (12.7–16.8)        | 17.1 (13.8–21.1)    | 5.97     | 0.005    |
| Male                                                 | 80.3 (78.5–81.9)    | 79.4 (75.9–82.4)        | 76.9 (73.2–80.3)    | 76.9 (74.0–79.6)           | 85.4 (83.2–87.3)        | 82.9 (78.9–86.2)    |          |          |
| Age (years)                                          |                     |                         |                     |                            |                         |                     |          |          |
| 18–29                                                | 31.5 (29.7–33.3)    | 26.8 (24.0–29.8)        | 30.8 (27.3–40.2)    | 35.9 (31.8–40.2)           | 36.8 (33.5–40.2)        | 41.3 (36.8–46.1)    | 7.60     | < 0.001  |
| 30–39                                                | 27.3 (25.8–29.0)    | 26.9 (24.0–29.9)        | 26.3 (23.8–29.1)    | 26.3 (23.8–29.1)           | 29.5 (26.7–32.3)        | 29.3 (25.4–33.6)    |          |          |
| 40–59                                                | 32.5 (30.8–34.3)    | 35.0 (31.8–38.2)        | 31.8 (28.6–35.2)    | 31.8 (28.6–35.2)           | 27.6 (25.4–39.9)        | 26.7 (23.4–30.3)    |          |          |
| ≥ 60                                                 | 8.6 (7.3–10.0)      | 11.3 (9.1–14.0)         | 6.0 (4.5–7.8)       | 6.0 (4.6–7.8)              | 6.1 (4.8–7.9)           | 2.6 (1.6–4.2)       |          |          |
| Race/skin color                                      |                     |                         |                     |                            |                         |                     |          |          |
| White                                                | 55.3 (51.8–58.7)    | 62.2 (57.2–66.9)        | 84.1 (79.5–87.9)    | 42.8 (39.9–46.9)           | 29.8 (26.5–33.3)        | 23.6 (19.2–28.7)    | 52.94    | < 0.001  |
| Black                                                | 7.7 (6.7–8.9)       | 7.8 (6.1–9.8)           | 3.8 (2.4–6.2)       | 5.6 (4.4–7.1)              | 11.5 (9.0–14.6)         | 8.1 (6.6–10.1)      |          |          |
| Brown                                                | 36.0 (33.0–39.0)    | 28.8 (24.8–33.2)        | 11.6 (8.9–15.0)     | 50.1 (46.0–54.2)           | 57.6 (54.3–60.8)        | 66.3 (60.7–71.5)    |          |          |
| Others                                               | 1.1 (0.8–1.4)       | 1.2 (0.7–1.9)           | 0.4 (0.2–0.8)       | 1.4 (0.7–2.8)              | 1.0 (0.7–1.6)           | 1.9 (1.1–3.4)       |          |          |
| Education                                            |                     |                         |                     |                            |                         |                     |          |          |
| Illiterate or elementary school incomplete           | 24.9 (22.8–27.2)    | 18.7 (26.1–21.6)        | 24.8 (21.0–29.1)    | 24.8 (19.6–30.9)           | 36.5 (31.9–41.5)        | 25.4 (21.3–29.9)    | 7.47     | < 0.001  |
| Elementary school complete or high school incomplete | 16.0 (14.6–17.5)    | 15.7 (13.4–18.8)        | 15.3 (12.5–18.9)    | 16.4 (14.0–19.0)           | 16.1 (13.8–18.7)        | 18.8 (14.5–24.1)    |          |          |
| High school complete or college school incomplete    | 38.1 (36.1–40.1)    | 39.6 (36.2–43.2)        | 37.6 (34.3–41.0)    | 38.1 (34.1–42.2)           | 34.3 (30.1–38.7)        | 43.3 (37.2–49.6)    |          |          |
| College school complete or above                     | 21.1 (18.5–23.8)    | 26.0 (21.3–31.2)        | 22.2 (18.3–26.7)    | 20.7 (14.7–28.2)           | 13.1 (10.3–16.5)        | 12.4 (9.3–16.5)     |          |          |
| Marital status                                       |                     |                         |                     |                            |                         |                     |          |          |
| With partner                                         | 62.3 (60.6–64.0)    | 60.7 (57.8–63.6)        | 66.6 (62.7–70.4)    | 61.9 (58.5–65.1)           | 62.3 (59.1–65.4)        | 59.4 (54.6–64.1)    | 2.45     | 0.055    |
| Without partner                                      | 37.7 (36.0–34.9)    | 39.3 (36.4–42.2)        | 33.4 (29.6–37.3)    | 38.1 (34.9–41.5)           | 37.7 (34.6–40.9)        | 40.6 (35.9–45.4)    |          |          |
| Depression                                           |                     |                         |                     |                            |                         |                     |          |          |
| No                                                   | 95.4 (94.6–96.0)    | 95.3 (93.7–96.6)        | 95.7 (94.0–97.0)    | 94.0 (92.0–95.5)           | 95.4 (94.0–96.5)        | 95.9 (94.2–97.2)    | 0.54     | 0.662    |
| Yes                                                  | 4.6 (3.9–5.4)       | 4.7 (3.4–6.2)           | 4.3 (3.0–6.0)       | 6.0 (4.5–8.0)              | 4.6 (3.5–5.9)           | 4.1 (2.8–5.8)       |          |          |
| Binge drinking                                       |                     |                         |                     |                            |                         |                     |          |          |
| No                                                   | 48.9 (46.8–51.2)    | 52.9 (49.6–56.1)        | 62.6 (58.4–66.7)    | 41.0 (37.4–44.7)           | 36.6 (33.0–44.4)        | 33.8 (30.3–37.5)    | 37.44    | < 0.001  |

|                             |                  |                  |                  |                  |                  |                  |      |       |
|-----------------------------|------------------|------------------|------------------|------------------|------------------|------------------|------|-------|
| Yes                         | 50.1 (48.8–53.1) | 47.1 (43.9–50.3) | 37.4 (33.3–41.6) | 59.0 (55.3–62.6) | 63.4 (59.6–67.0) | 66.2 (62.5–69.7) |      |       |
| Age at start of alcohol use |                  |                  |                  |                  |                  |                  |      |       |
| (years)                     |                  |                  |                  |                  |                  |                  |      |       |
| ≥ 18                        | 52.3 (50.5–54.1) | 55.8 (52.6–59.0) | 49.2 (45.1–53.2) | 51.6 (48.1–55.1) | 48.5 (45.3–51.7) | 53.4 (48.3–58.4) | 4.47 | 0.003 |
| < 18                        | 47.7 (45.8–49.5) | 44.2 (41.0–47.4) | 50.8 (46.8–54.9) | 48.4 (44.9–51.9) | 51.5 (48.3–54.7) | 46.6 (41.6–51.7) |      |       |
| Tobacco use                 |                  |                  |                  |                  |                  |                  |      |       |
| No                          | 77.3 (75.6–78.9) | 74.8 (71.5–77.9) | 82.0 (78.9–84.8) | 78.9 (76.2–81.4) | 77.1 (74.5–79.6) | 78.6 (75.8–81.2) | 4.72 | 0.003 |
| Yes                         | 22.7 (21.0–24.4) | 25.2 (22.1–28.5) | 18.0 (15.2–21.1) | 21.1 (18.6–23.8) | 22.9 (20.4–25.5) | 21.4 (19.0–24.2) |      |       |
| Residence area              |                  |                  |                  |                  |                  |                  |      |       |
| Capital                     | 24.8 (19.1–31.5) | 25.0 (15.0–38.7) | 15.0 (8.1–26.0)  | 39.1 (23.7–57.0) | 25.8 (17.5–36.2) | 32.1 (18.5–49.6) | 1.29 | 0.254 |
| Metropolitan region         | 12.9 (8.5–18.9)  | 16.8 (8.7–30.0)  | 10.4 (5.7–21.7)  | 7.8 (2.3–20.2)   | 10.9 (5.9–19.2)  | 6.6 (1.8–21.9)   |      |       |
| Other                       | 62.3 (55.2–69.9) | 58.2 (44.6–70.7) | 74.6 (61.9–84.2) | 53.0 (36.0–69.0) | 63.3 (52.8–72.7) | 61.3 (43.6–76.4) |      |       |

Note: Data are presented as % (95.0%CI); \*Pearson's chi-square test.
